# Low-Dose Oral Sirolimus and the Risk of Menstrual-Cycle Disturbances and Ovarian Cysts: Analysis of the Randomized Controlled SUISSE ADPKD Trial

Matthias Braun<sup>1</sup>, James Young<sup>2</sup>, Cécilia S. Reiner<sup>3</sup>, Diane Poster<sup>1</sup>, Fabienne Krauer<sup>1</sup>, Andreas D. Kistler<sup>1</sup>, Paulus Kristanto<sup>4</sup>, Xueqi Wang<sup>5</sup>, Yang Liu<sup>6</sup>, Johannes Loffing<sup>7</sup>, Gustav Andreisek<sup>3</sup>, Arnold von Eckardstein<sup>8</sup>, Oliver Senn<sup>9</sup>, Rudolf P. Wüthrich<sup>1</sup>, Andreas L. Serra<sup>1\*</sup>

**1** Division of Nephrology, University Hospital, Zürich, Switzerland, **2** Biometrical Practice BIOP AG, Basel, Switzerland, **3** Division of Diagnostic and Interventional Radiology, University Hospital, Zürich, Switzerland, **4** Medication Adherence Research Centre, AARDEX Group, Visé, Belgium, **5** Department of Nephrology, Changzheng Hospital, Shanghai, China, **6** Center for Integrative Human Research, University of Zürich, Zürich, Switzerland, **7** Institute of Anatomy, University of Zürich, Zürich, Switzerland, **8** Institute of Clinical Chemistry, University Hospital, Zürich, Switzerland, **9** Institute of General Practice and Health Services Research, University Hospital, Zürich, Switzerland

## Abstract

Sirolimus has been approved for clinical use in non proliferative and proliferative disorders. It inhibits the mammalian target of rapamycin (mTOR) signaling pathway which is also known to regulate ovarian morphology and function. Preliminary observational data suggest the potential for ovarian toxicity but this issue has not been studied in randomized controlled trials. We reviewed the self-reported occurrence of menstrual cycle disturbances and the appearance of ovarian cysts *post hoc* in an open label randomized controlled phase II trial conducted at the University Hospital Zürich between March 2006 and March 2010. Adult females with autosomal dominant polycystic kidney disease, an inherited kidney disease not known to affect ovarian morphology and function, were treated with 1.3 to 1.5 mg sirolimus per day for a median of 19 months (N=21) or standard care (N=18). Sirolimus increased the risk of both oligoamenorrhea (hazard ratio [HR] 4.3, 95% confidence interval [CI] 1.1 to 29) and ovarian cysts (HR 4.4, CI 1.1 to 26); one patient was cystectomized five months after starting treatment with sirolimus. We also studied mechanisms of sirolimus-associated ovarian toxicity in rats. Sirolimus amplified signaling in rat ovarian follicles through the pro-proliferative phosphatidylinositol 3-kinase pathway. Low dose oral sirolimus increases the risk of menstrual cycle disturbances and ovarian cysts and monitoring of sirolimus-associated ovarian toxicity is warranted and might guide clinical practice with mammalian target of rapamycin inhibitors.

**Trial Registration:** ClinicalTrials.gov NCT00346918

**Citation:** Braun M, Young J, Reiner CS, Poster D, Krauer F, et al. (2012) Low-Dose Oral Sirolimus and the Risk of Menstrual-Cycle Disturbances and Ovarian Cysts: Analysis of the Randomized Controlled SUISSE ADPKD Trial. PLoS ONE 7(10): e45868. doi:10.1371/journal.pone.0045868

**Editor:** Frederick G. Hamel, Omaha Veterans Affairs Medical Center, United States of America

**Received:** April 16, 2012; **Accepted:** August 22, 2012; **Published:** October 10, 2012

**Copyright:** © 2012 Braun et al. This is an open-access article distributed under the terms of the Creative Commons Attribution License, which permits unrestricted use, distribution, and reproduction in any medium, provided the original author and source are credited.

**Funding:** This work was supported by the Swiss National Science Foundation, by the Polycystic Kidney Foundation (Kansas, MO, USA), by the Swiss Sino Science Technology Cooperation, by the Binelli and Ehsam Foundation (Zürich, Switzerland) and by an unrestricted research grant from Wyeth (now Pfizer). Wyeth Switzerland AG (now Pfizer) provided the trial drug sirolimus, GE Healthcare Switzerland provided a W-workstation for analysis of magnetic resonance imaging data. The funders had no role in study design, data collection and analysis, decision to publish, or preparation of the manuscript.

**Competing Interests:** ALS received consulting fees from Hoffmann–La Roche and Nycomed, and grant support from Wyeth (now Pfizer); DP received travel support from Wyeth (now Pfizer); ADK received lecture fees from Wyeth and Genzyme, and travel support from Amgen; JY is an employee of Biometrical Practice BIOP; PK is an employee of Aardex; RPW received consulting and lecture fees from Genzyme, Novartis and Wyeth, and grant support from Wyeth. This does not alter the authors' adherence to all the PLOS ONE policies on sharing data and materials.

\* E-mail: andreas.serra@usz.ch

## Introduction

Sirolimus (Rapamune, Pfizer, New York, NY, USA) is a potent immunosuppressive and anti-proliferative drug which blocks the mammalian target of rapamycin (mTOR). mTOR is a key regulatory kinase which is also known to regulate ovarian function [1]. The drug has been approved by both the US Food and Drug Administration and the European Medicines Agency for the prevention of renal allograft rejection.

Most of our knowledge regarding sirolimus toxicity has been derived from kidney transplant efficacy trials. However there were no reports of menstrual cycle disturbances and ovarian cyst formation in three large clinical trials [2,3,4], although these

adverse events were reported in three case series [5,6,7]. Ovarian dysfunction is difficult to recognize in clinical trials: symptoms are often non-specific and can be wrongly attributed to concomitant medication or comorbidities [8].

Aside from organ transplantation, sirolimus is being assessed for clinical effectiveness in several cancers and in other proliferative disorders, including autosomal dominant polycystic kidney disease (ADPKD). ADPKD is characterized by the growth of kidney cysts; the disease itself is not known to affect ovarian morphology and function [9,10,11]. Although sirolimus shows promise in rodent polycystic kidney disease models [12,13,14,15,16,17], 18 months treatment with sirolimus did not slow the growth of kidney cysts in adults with ADPKD [18].

Animal and observational data suggest the potential for ovarian toxicity but this issue has not been considered in previous trials [19]. We sought to determine whether sirolimus causes menstrual cycle disturbances and ovarian cysts in adults with ADPKD enrolled in a randomized controlled trial. Here we extend a letter [20] warning of an increased risk of ovarian toxicity among patients receiving sirolimus; we provide full details and suggest a possible mechanism of toxicity.

## Methods

### Trial Setting

The SUISSE ADPKD study was a randomized controlled phase II trial carried out to determine whether 18 months of treatment with sirolimus slows kidney growth in adults with ADPKD. The occurrence of menstrual cycle disturbances and ovarian cysts were pre-defined secondary endpoints in the statistical analysis plan [18]. From March 2006 through March 2008 we enrolled 100 patients (39 females) with ADPKD at the University Hospital Zurich [21]. These patients were between 18 and 40 years of age, with an estimated creatinine clearance of at least 70 milliliter per minute. The trial was run according to the principles of the Declaration of Helsinki, the Good Clinical Practice guidelines of the International Conference on Harmonization, and local regulatory requirements. The protocol for this trial and supporting CONSORT checklist are available as supporting information; see Checklist S1 and Protocol S1. The medical ethics committee of the Canton Zürich, Switzerland (SPUK) approved the trial protocol [22]. All patients gave written informed consent.

After a run-in period of 6 months, patients were randomly assigned to receive either 18 months treatment with sirolimus (target dose 2 mg daily) or standard care. Standard care consisted of blood pressure control (office systolic and diastolic blood pressure targets below 130 and 85 mm Hg respectively), prompt antibiotic treatment of kidney cyst infections, and avoidance of potentially nephrotoxic substances. The sirolimus dose was adjusted to achieve steady-state levels between 4 and 10 µg per liter, determined by liquid chromatography–mass spectrometry from whole blood. Patient adherence to sirolimus was assessed using an electronic system (MEMS<sup>TM</sup>, Aardex Group, Ltd., Sion, Switzerland).

Wyeth (now Pfizer) had no role in the trial design, collection, analysis and interpretation of the data or the writing of the report. Andreas L. Serra and James Young had full access to the study data and take responsibility for the integrity of the data and the accuracy of the data analysis.

### Assessment of trial outcomes

At enrollment, randomization, 6, 12 and 18 months patients were asked if they had any menstrual cycle abnormalities in the past 6 months. Oligoamenorrhea was defined as no menstrual period for 3 months or more when one should have occurred, or an interval of more than 35 days between menstrual periods. Our definition of oligoamenorrhea was based on criteria used in epidemiologic studies [23,24].

Abdominal magnetic resonance imaging (MRI) without contrast material was performed every 6 months using a 1.5T MR scanner (Signa Echospeed Excite HD or HDx, General Electric (GE) Healthcare, Waukesha, Wisconsin, USA).[25] At each point in time, the number and diameter of right and left ovarian cysts greater than 2 cm in diameter were measured on coronal T2-weighted single-shot fast spin echo sequences acquired in breath hold technique using a dedicated computer workstation (Advan-

tage Windows Workstation 4.4, GE Healthcare). The workstation observer was blinded to all clinical data and patients were measured in random order.

### Statistical Analysis

Analyses of prevalence and incidence were carried out using logistic and Cox proportional hazards regression in SAS version 9.2 (Cary, NC, USA). Outcomes for logistic regression were any patient report of oligoamenorrhea and any detected ovarian cyst greater than 2 cm in diameter during the 18 months treatment period. Outcomes for Cox proportional hazards regression were time to a first report of oligoamenorrhea in those without oligoamenorrhea at randomization, and time to a first ovarian cyst greater than 2 cm in diameter in those without such cysts at randomization. Since these outcomes can only be assessed at each visit we used a discrete time version of the Cox proportional hazards model.[26] For both logistic and proportional hazard regression, we report profile likelihood and exact confidence intervals. With few events, maximum likelihood estimates for odds and hazard ratios tend to be biased away from a value of one [27,28] however, exact confidence intervals tend to be wider than is strictly necessary [29,30]. With few events, it is not sensible to include covariates in any of our models and we estimate only the effect of the randomized treatment on outcome. The discrete time version of the Cox proportional hazards model has a complementary log-log link function and an offset to adjust for some slight variation in the time between visits scheduled 6 months apart [26]. However the exact estimate must be based on a model with a logit link function and no offset.

### Animal Studies

The sirolimus-associated effects on the mTOR signaling pathway in ovaries were examined by Western blotting and immunohistochemistry in rats given oral sirolimus. The animal study was approved by the animal health regulatory agency of the Canton Zürich, Switzerland.

### Animal Study Procedures

Female 4 week old Wistar rats were given daily 3.0 milligram per kilogram body weight sirolimus (N = 4) or vehicle (N = 4) by gavage feeding. The rats were sacrificed during pro-estrus three weeks after initiation of treatment at six PM and serum levels of follicle and luteal stimulating hormones were measured by enzyme linked immunoassay according to the manufactures' protocol.

### Western Blots

Ovaries were homogenized with ice-cold lysis buffer containing 40 mM Hepes, 120 mM NaCl, 1 mM ethylenediaminetetraacetic acid (EDTA), 10 mM potassium pyrophosphate, 10 mM glycerol phosphate, 50 mM NaF, 0.5 mM NaVO<sub>3</sub>, 1% Triton, and protease inhibitor (pH 7.6). Tissue lysates were cleared by centrifugation. Equal amounts of lysates were resolved on sodium dodecyl sulfate polyacrylamide gel electrophoresis (SDS-PAGE), transferred to nitrocellulose membranes, and probed with antibodies. Cell Signaling Technology supplied antibodies against Akt<sup>Ser473</sup>, p70 S6K<sup>Thr421/Ser424</sup> and p70 S6K; Abcam supplied an anti-Akt antibody; Millipore supplied an anti-glyceraldehyde-3-phosphate dehydrogenase (GAPDH) antibody.

### Immunohistochemistry

Paraffin-embedded sections were cut and stained by the immunoperoxidase technique, following standard methods of deparaffinization, antigen retrieval, primary antibody incubation

with either anti-Akt Ser473 (Cell Signaling) or anti-p70 S6K Thr421 (GenWay), secondary antibody incubation, 3,3-diaminobenzidine (DAB) incubation, and counterstaining with methyl green.

## Results

### Patients

Of the 39 females enrolled, 21 were randomized to receive sirolimus and 18 to receive standard care. Follow-up was complete in all but one patient receiving sirolimus who withdrew at 6 months (**Figure 1**). At randomization, patient characteristics were similar between the groups (**Table 1**): 2 patients in the sirolimus group and 1 patient in the control group reported at least one episode of oligoamenorrhea in the last 6 months (**Table 2**). At randomization, ovarian cysts were recorded in 2 patients in the sirolimus group and in 4 patients in the control group (**Table 2**).

Median (interquartile range [IQR]) follow up time after randomization was 19 months (19–20) and 19 months (18–20) in the sirolimus and control groups, respectively. Both the numbers of missing reports of menstrual cycle disturbances and the number of unreadable MRI scans were lower among patients in the sirolimus group (**Table 2**).

### Trial Outcomes

A total of 11 out of 21 patients in the sirolimus group reported oligoamenorrhea at any visit after randomization, compared to 3 out of 18 patients in the control group (**Table 2**). Five patients in the sirolimus group reported more than one episode of oligoamenorrhea during the trial whereas only one patient in the control group reported more than one episode of oligoamenorrhea (**Figure 2**).

Ovarian cysts were observed in 12 out of 21 patients in the sirolimus group, compared to 5 out of 18 patients in the control group (**Table 2**). Six patients in the sirolimus group had ovarian cysts at more than one visit after randomization compared to only two patients in the control group (**Figure 2**). One patient presented with acute abdominal pain and a large cyst of the left ovary while receiving sirolimus and was cystectomized at 164 days after randomization.

Differences in cycle disturbances were apparent in those not on oral contraceptives – 8 out of 11 and 2 out of 9 patients in the sirolimus and control groups; but were less apparent in those on oral contraceptives – 3 out of 10 and 1 out of 9 patients in the sirolimus and control groups. Differences in ovarian cysts between sirolimus and control did not seem to depend on the contraceptive

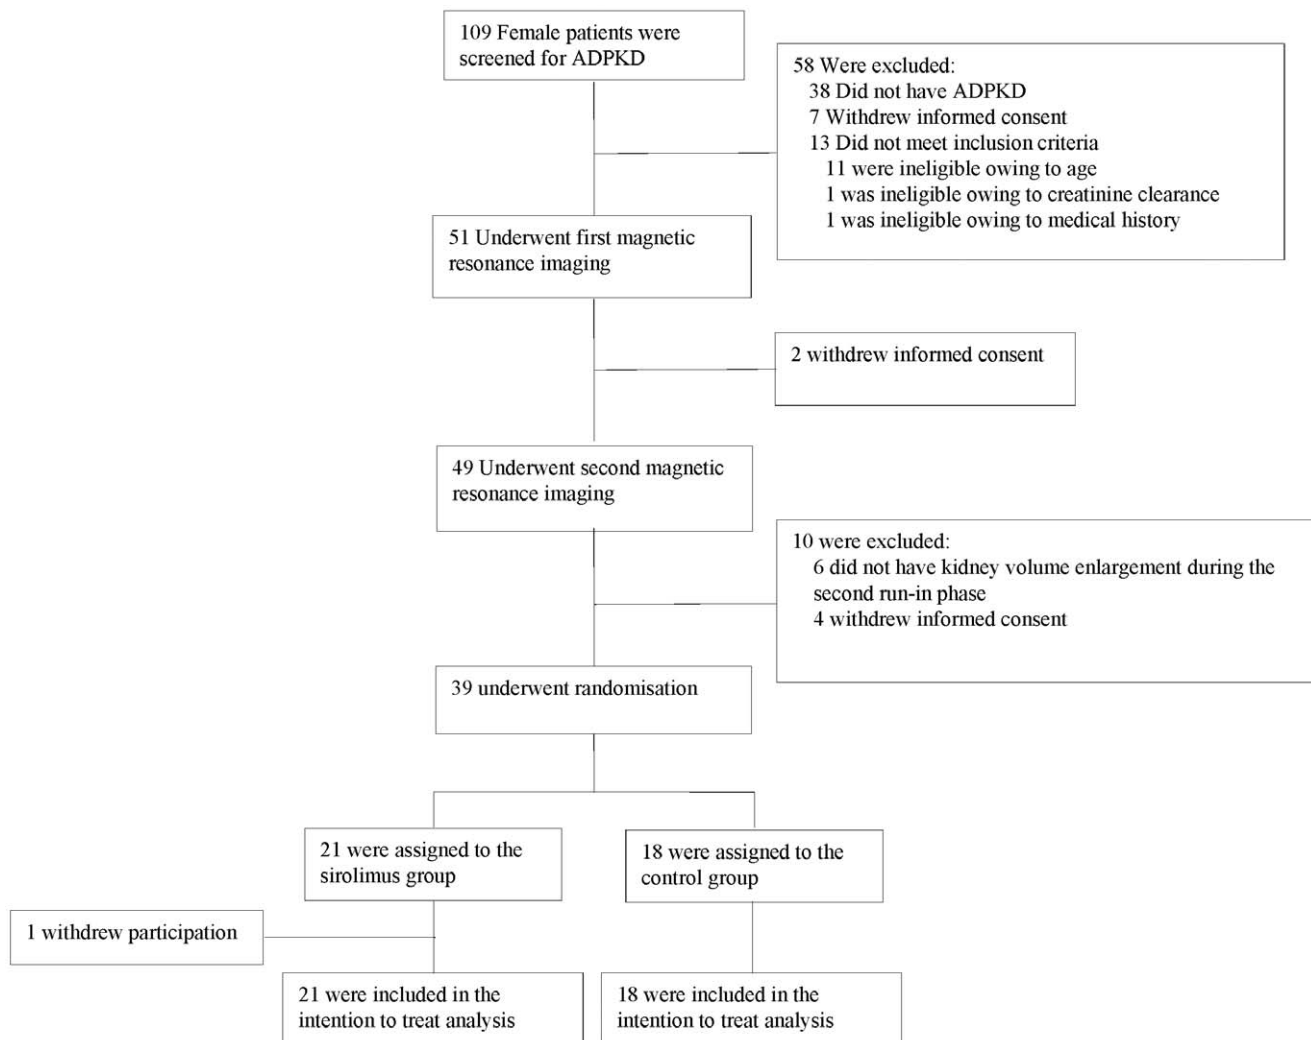

**Figure 1. Enrollment and Outcomes.**

doi:10.1371/journal.pone.0045868.g001

**Table 1.** Characteristics of patients at randomization.\*

| Characteristic – values are means (standard deviation) or numbers (percent) | Sirolimus | Control  |
|-----------------------------------------------------------------------------|-----------|----------|
|                                                                             | (N = 21)  | (N = 18) |
| Age – year                                                                  | 31 (8)    | 32 (7)   |
| BMI – kilogram per m <sup>2</sup> †                                         | 22 (3)    | 22 (3)   |
| <b>Blood pressure – mm Hg</b>                                               |           |          |
| Systolic                                                                    | 132 (12)  | 120 (11) |
| Diastolic                                                                   | 83 (11)   | 78 (10)  |
| Estimated GFR – ml/min per 1.73 m <sup>2</sup> ‡                            | 88 (20)   | 96 (16)  |
| <b>Chronic kidney disease stage – no. (%)¶</b>                              |           |          |
| 1                                                                           | 10 (48)   | 11 (61)  |
| 2                                                                           | 10 (48)   | 7 (39)   |
| 3                                                                           | 1 (5)     | 0        |
| Menarche – year‡                                                            | 13 (2)    | 13 (2)   |
| <b>Parity – no. (%)‡</b>                                                    |           |          |
| Nulliparous                                                                 | 13 (62)   | 14 (78)  |
| 1–2                                                                         | 7 (33)    | 4 (22)   |
| >2                                                                          | 1 (5)     | 0        |
| <b>Contraception – no. (%)‡</b>                                             |           |          |
| Hormonal                                                                    | 10 (48)   | 9 (50)   |
| Barrier method                                                              | 11 (52)   | 9 (50)   |

\*From New England Journal of Medicine, Ovarian toxicity from sirolimus, Braun M, Young J, Reiner CS, Poster D, Wüthrich RP, Serra AL. 366(11):1062-4. Copyright © (2012) Massachusetts Medical Society. Reprinted with permission.

†The body-mass index (BMI) is the weight in kilograms divided by the square of the height in meters.

‡The glomerular filtration rate (GFR) was estimated by using the Chronic Kidney Disease Epidemiology Collaboration (CKD-EPI) equation [48].

¶Chronic kidney disease was classified according to the Kidney Disease Outcomes Quality Initiative of the National Kidney Foundation. Stage 1 denotes a glomerular filtration rate (GFR) of 90 ml or more per minute per 1.73 m<sup>2</sup> of body-surface area; stage 2, a GFR of 60 to 89 ml per minute; and stage 3, a GFR of 30 to 59 ml per minute.

‡Patients' self-reported medical histories at randomization.

doi:10.1371/journal.pone.0045868.t001

**Table 2.** Number of patients with oligoamenorrhea and ovarian cysts.\*

| Number of patients (percent) [missing if any] | Sirolimus N = 21 | Control N = 18 |
|-----------------------------------------------|------------------|----------------|
| <b>Oligoamenorrhea‡</b>                       |                  |                |
| Enrollment                                    | 3 (14)           | 2 (12) [1]     |
| Randomization                                 | 2 (10) [1]       | 1 (7) [3]      |
| 6 months                                      | 9 (43)           | 2 (11)         |
| 12 months                                     | 5 (25) [1]       | 2 (11)         |
| 18 months                                     | 5 (26) [2]       | 1 (6)          |
| Any visit after randomization                 | 11 (52)          | 3 (17)         |
| <b>Ovarian cysts†</b>                         |                  |                |
| Enrollment                                    | 4 (19)           | 4 (25) [2]     |
| Randomization                                 | 2 (10)           | 4 (24) [1]     |
| 6 months                                      | 6 (29)           | 2 (14) [4]     |
| 12 months                                     | 6 (30) [1]       | 3 (18) [1]     |
| 18 months                                     | 7 (39) [3]       | 2 (12) [1]     |
| Any visit after randomization                 | 12 (57)          | 5 (28)         |

\*From New England Journal of Medicine, Ovarian toxicity from sirolimus, Braun M, Young J, Reiner CS, Poster D, Wüthrich RP, Serra AL. 366(11):1062-4. Copyright © (2012) Massachusetts Medical Society. Reprinted with permission.

†Patients' self-reported events during the 6 months before the visit.

‡Assessed by two independent observers – there was no disagreement between observers.

doi:10.1371/journal.pone.0045868.t002

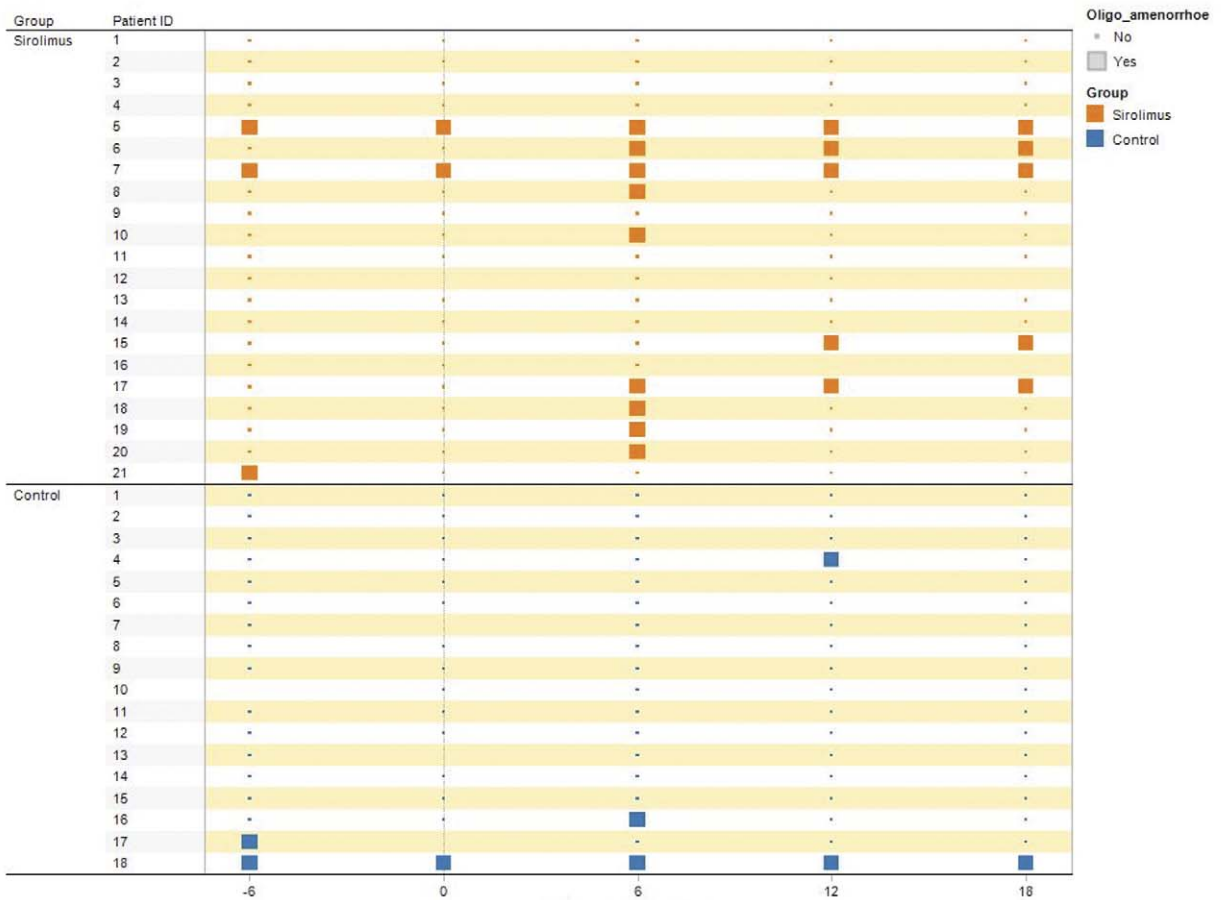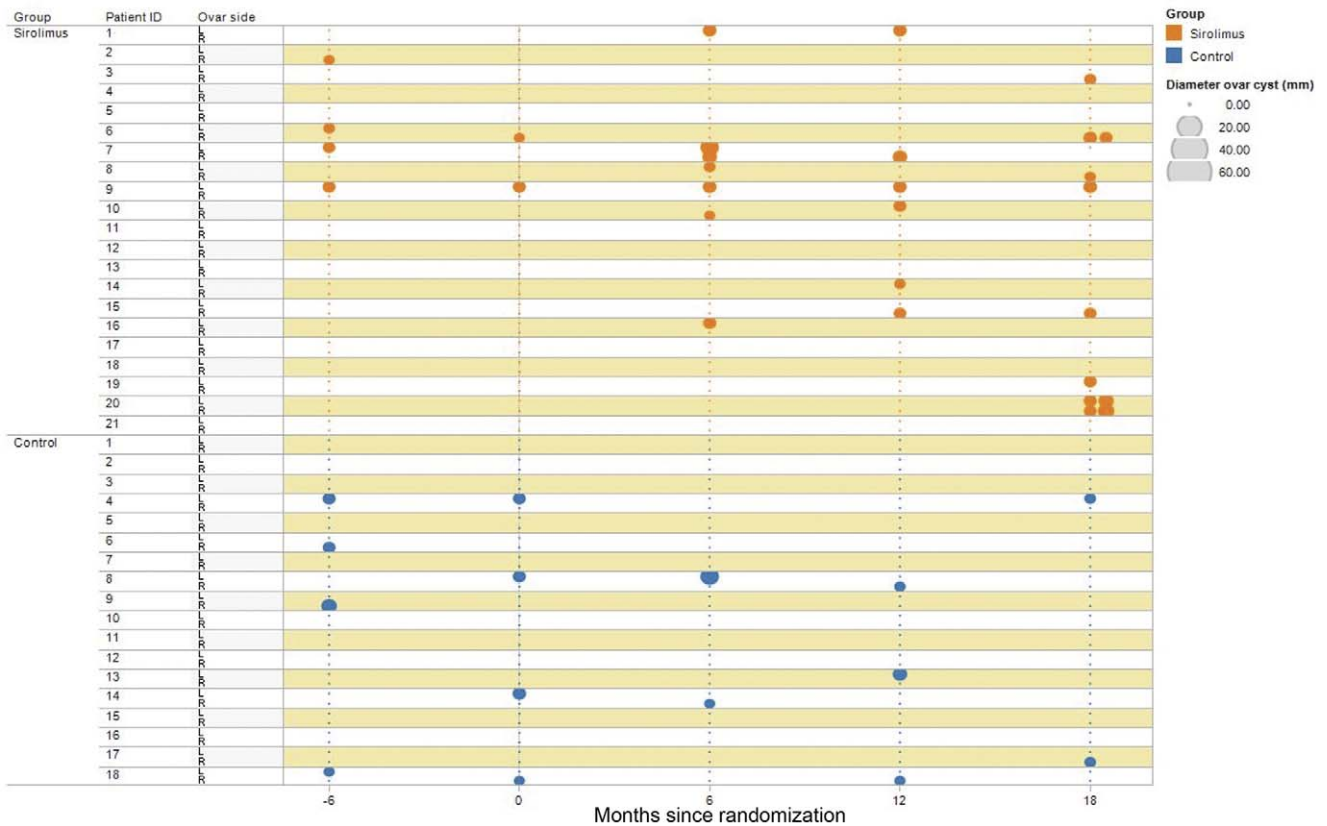

**Figure 2. Oligoamenorrhea (upper panel) and the size (lower panel; in millimeters) and the left-right location (R, L) of ovarian cysts over time in the sirolimus (orange) and control (blue) groups.**  
doi:10.1371/journal.pone.0045868.g002

method (barrier methods: 7 out of 11 and 3 out of 9 patients in the sirolimus and control groups; oral contraceptives: 5 out of 10 and 2 out of 9 patients in the sirolimus and control groups).

Although imprecise, estimates of odds and hazard ratios suggest that the prevalence and incidence of both oligoamenorrhea and ovarian cysts were higher among patients receiving sirolimus (**Table 3**).

### Adherence to Sirolimus

Mean sirolimus doses were between 1.2 and 1.5 milligram per day and the sirolimus steady-state blood levels between 3.5 and 4.7 microgram per liter (**Table 4**). Patient adherence to sirolimus, measured by percentage of correct dosing, was 95% over the 18 month treatment period (**Figure 3**).

### Animal Studies

Rats given sirolimus 3.0 milligram per kilogram per day for three weeks, a dose that produces blood concentrations similar to those in patients [31], had lower body weight:  $260 \pm 14$  g (mean  $\pm$  standard deviation) in the sirolimus group and  $291 \pm 17$  g in the control group. The ratios of ovaries to body weight were similar between groups:  $0.045 \pm 0.013$  in the sirolimus group and  $0.039 \pm 0.001$  in the control group. We did not find evidence for an increased frequency of ovarian cysts: two observers blinded for the treatment allocation reviewed the histological sections and reported no difference in the number and morphology of ovarian follicles. The automatically calculated ratios of blank space to total ovarian area on histological slides, as a proxy for ovarian cysts, were similar in both groups:  $9.5 \pm 2.7\%$  in the sirolimus group and  $8.5 \pm 2.4\%$  in the control group. The cycle lengths were similar both groups:  $7 \pm 4$  days in the sirolimus group and  $5 \pm 3$  days in the control group. The frequencies of abnormal cycles were higher among rats receiving sirolimus: 50% in the sirolimus group and 16% in the control group. Sirolimus blocked the mTOR pathway and amplified signaling in ovarian follicles through the proliferative phosphatidylinositol 3-kinase pathway (**Figure 4**).

Serum levels of follicle stimulating and luteinizing hormones (FSH, LH) were similar between groups: FSH:  $1.8 \pm 0.3$  and  $2.2 \pm 0.3$  nanograms per milliliter in the sirolimus and control groups respectively; LH:  $3.4 \pm 0.7$  and  $3.1 \pm 0.4$  nanograms per milliliter in the sirolimus and control groups respectively.

### Discussion

When given sirolimus at a relatively low dose for a median of 19 months, 52% of 21 patients with ADPKD reported menstrual cycle abnormalities, compared to 17% of 18 patients in the control group. Sirolimus also increased the risk of ovarian cysts, and one patient was cystectomized after receiving sirolimus for five months. With relatively few female patients, it is not possible to make precise estimates but these increases in relative risk are potentially large – with a fourfold increase or more possible.

Reports from other studies suggest a lower ovarian toxicity or make no mention of it at all. In a multi-center placebo controlled phase II trial, Kahan and colleagues did not report menstrual cycle abnormalities in 47 female kidney allograft recipients receiving sirolimus for 12 months [4]. In two multi-center placebo controlled phase III trials, 180 and 149 female kidney allograft recipients were given sirolimus for 12 and 6 months respectively and there were no reports of menstrual cycle disturbance or ovarian cysts among these patients [2,3]. This discrepancy is likely explained by the systematic and prospective assessment for menstrual cycle and ovarian cyst formation in our study which was not done in these large multicenter studies.

Our findings of sirolimus associated ovarian toxicity are supported by two reports of a higher frequency of oligoamenorrhea and ovarian cysts in pancreatic islet recipients treated with a dual therapy of sirolimus and tacrolimus [6,7]. Cure and colleagues reported a higher frequency of oligoamenorrhea after transplantation and the occurrence of ovarian cysts in 8 of 13 patients, while serum follicle and luteinizing hormone levels remained in the normal range [6]. Alfadhli and colleagues reported on the occurrence of ovarian cysts in 31 of 44 premenopausal patients 8 months after transplantation and then after sirolimus withdrawal, a cyst size reduction in 80% of these 31 patients [7].

Sirolimus-associated adverse events of this sort are usually not assessed in randomized trials, even though normal menstrual cycle recovery after successful organ transplantation is a major benefit and a biological marker of general health, and menstrual cycle abnormalities are a sign of lower fertility and are associated with cardiovascular disease and bone loss.[32,33] In clinical practice, sirolimus is often given simultaneously with other immunosuppressants making it difficult to reliably link observed ovarian toxicity with a single immunosuppressive agent.

In our phase II trial, we enrolled patients with early stage autosomal dominant polycystic kidney disease. The disease is characterized by the cystic enlargement of both kidneys while glomerular filtration rate remains preserved up to age 40 in most patients [34,35]. There is no evidence that ADPKD affects the menstrual cycle or fertility in woman with normal renal function [11,36]. Cysts can also occur infrequently in organs other than the kidneys;[37] however, the frequency of ovarian cysts, ovarian size and follicle dimensions are no different in women with ADPKD than in a normal population [9,10]. Our cyst measurements may have included normal pre-ovulatory follicles as false positives.

**Table 3.** The effect of treatment with sirolimus on the prevalence and incidence of oligoamenorrhea and ovarian cysts: odds and hazard ratios from logistic and Cox proportional hazard regression.

|                                                            | Oligoamenorrhea |            | Ovarian cysts |            |
|------------------------------------------------------------|-----------------|------------|---------------|------------|
|                                                            | Estimate        | 95% CI     | Estimate      | 95% CI     |
| <b>Logistic regression – odds ratios</b>                   |                 |            |               |            |
| Profile likelihood                                         | 5.5             | 1.3 to 29  | 3.5           | 0.94 to 14 |
| Exact                                                      | 5.3             | 1.0 to 37  | 3.4           | 0.76 to 17 |
| <b>Cox proportional hazards regression – hazard ratios</b> |                 |            |               |            |
| Profile likelihood                                         | 4.3             | 1.1 to 29  | 4.0           | 1.1 to 26  |
| Exact*                                                     | 4.4             | 0.75 to 48 | 4.3           | 0.82 to 43 |

\*Exact hazard ratios were estimated using a model with a logit link function and no offset. Profile likelihood estimates for this alternative model were 4.5, (95% confidence interval [CI] 1.1 to 31) and 4.6, (95% CI 0.99 to 34) for oligoamenorrhea and ovarian cysts respectively.  
doi:10.1371/journal.pone.0045868.t003

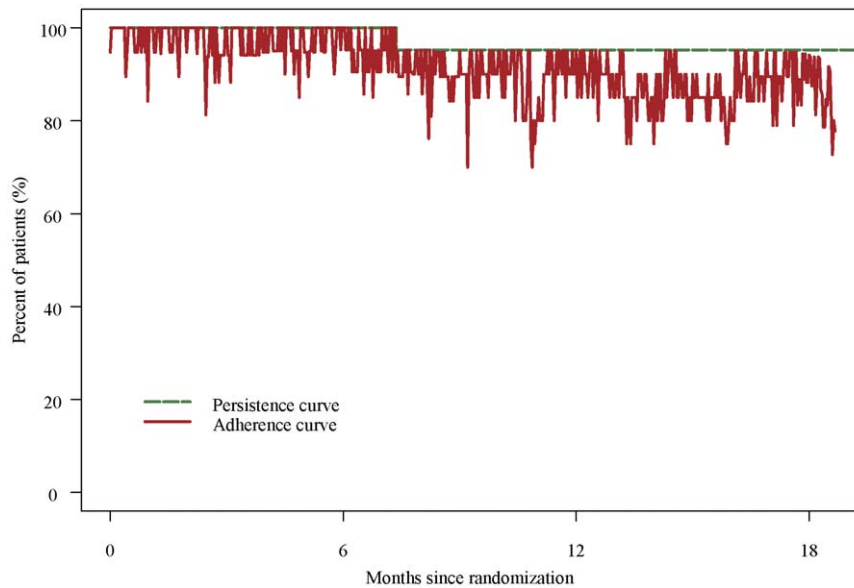

**Figure 3. Time course of adherence parameters (persistence and adherence) in patients assigned to the sirolimus group.** The persistence curve shows a Kaplan Meier estimation of the proportion of patients on treatment. The adherence curve indicates the day-to-day proportion of patients who took sirolimus as prescribed. Data from 21 individual dosing histories were used for this analysis. doi:10.1371/journal.pone.0045868.g003

However our analyses show that sirolimus increased the risk of both ovarian cysts and menstrual cycle disturbances in patients receiving sirolimus and these differences between randomized groups suggest that the cysts detected in patients treated with sirolimus were probably not normal.

The sirolimus target mTOR is a key regulatory kinase of cell growth, proliferation and differentiation and is also expressed in non-T-cells, which can lead to unexpected toxicities including the ovaries. Animal studies indicate that the mTOR signaling pathway regulates luteal hormone receptor action [38], the follicle-stimulating hormone signaling pathway [39], granulosa [40] and luteal [41] cell proliferation and control of primordial oocyte dormancy [42]. Shivaswamy and colleagues reported an increased frequency of abnormal cycles and hyperinsulinemia in Sprague-Dawley rats receiving daily 2 milligrams sirolimus subcutaneously for 4 weeks, but a similar frequency of abnormal ovarian follicles in the their sirolimus and control groups [19]. We also observed an increased frequency of abnormal cycles in Wistar rats receiving

sirolimus for 3 weeks, and a similar number and morphology of ovarian follicles in our sirolimus and control groups.

Polycystic ovary syndrome (PCOS) manifests as menstrual cycle disturbances, ovarian cysts, and insulin resistance [43]. Sirolimus causes insulin resistance in rodents [19] and in humans [44,45] and we observed cycle disturbance and ovarian cysts in our ADPKD patients when treated with sirolimus, suggesting sirolimus promotes a polycystic ovary like syndrome. In our animal study, sirolimus activated Akt in ovaries. Polymorphisms of the Akt gene were associated with an increased risk for the occurrence of PCOS in epidemiological studies [46] and an increase in the insulin-induced IRS/PI 3-kinase/Akt pathway in rat ovaries caused a PCOS like phenotype [47], suggesting this pathway has a role in the development of ovarian cysts.

Our results should be interpreted in the context of the trial setting. Even though the achieved sirolimus dose was approximately 35% lower than the intended dose, mainly because of dose-limiting gastrointestinal side effects, our findings show evidence of sirolimus-associated ovarian toxicity. Close monitoring is therefore

**Table 4. Sirolimus dosage, sirolimus steady-state blood level and parameters of treatment adherence in patients assigned to the sirolimus group.**

| Months    | Sirolimus dosage*<br>(milligram per day) | Sirolimus level*<br>(microgram per liter) | Continuation <sup>†</sup> (%) | Adherence <sup>‡</sup> (%) |
|-----------|------------------------------------------|-------------------------------------------|-------------------------------|----------------------------|
| 3 months  | 1.1 (0.5)                                | 3.5 (1.0)                                 | 100                           | 97.6                       |
| 6 months  | 1.3 (0.4)                                | 3.5 (1.1)                                 | 100                           | 96.9                       |
| 9 months  | 1.2 (0.6)                                | 3.7 (1.1)                                 | 95.2                          | 95.1                       |
| 12 months | 1.4 (0.4)                                | 4.2 (1.9)                                 | 95.2                          | 93.9                       |
| 18 months | 1.5 (0.5)                                | 4.7 (1.6)                                 | 95.2                          | 92.2                       |

\*Values are means (standard deviation).

<sup>†</sup>Continuation was defined as the proportion of patients who remained on the sirolimus treatment.

<sup>‡</sup>Adherence was defined for each specific time interval as the average daily proportion of patients who took their sirolimus dose as prescribed among those still on the sirolimus treatment.

doi:10.1371/journal.pone.0045868.t004

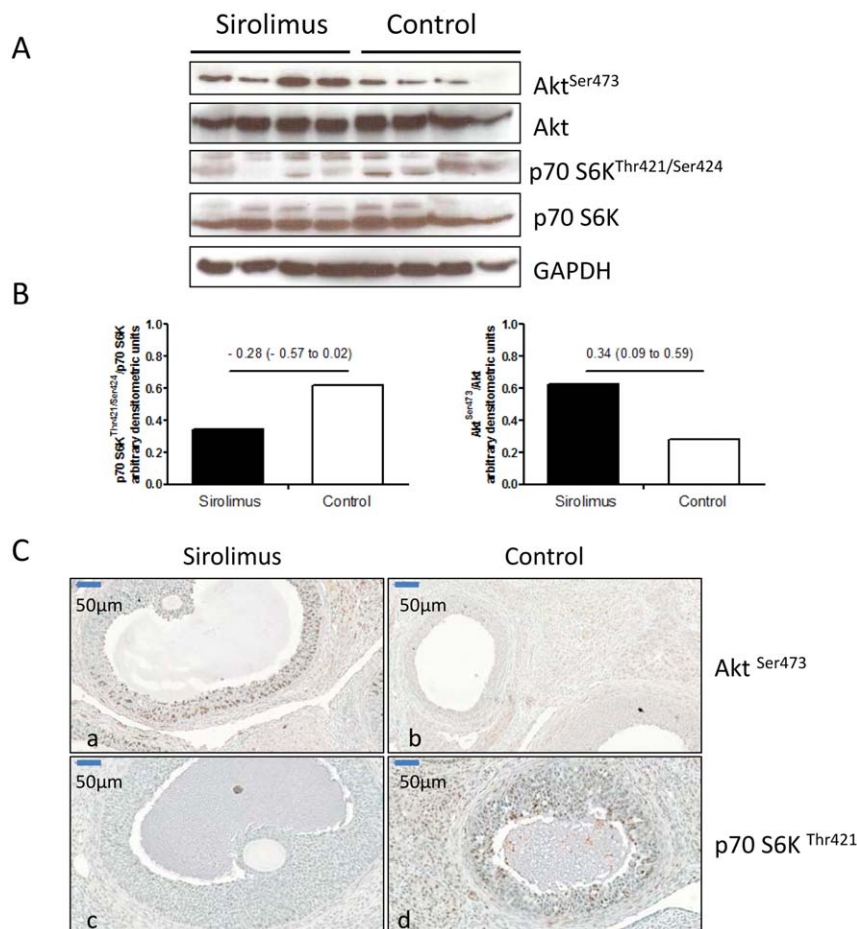

**Figure 4. Molecular (Panel A and B) and immunohistochemical analyses (Panel C) of rat ovary.** Panel A. Gel electrophoresis of proteins carried out to assess sirolimus-associated changes in the activity of key signaling pathways thought to regulate ovarian function and morphology. Sirolimus treatment amplified signaling through phosphatidylinositol 3-kinase (Akt<sup>Ser473</sup>), thought to be associated with human polycystic ovarian syndrome, and blocked the mammalian target of rapamycin pathway (p70 S6K<sup>Thr421/Ser424</sup>). Panel B. The ratios of phosphorylated to non-phosphorylated molecules are expressed in arbitrary densitometric units (Sirolimus minus control – mean (95% confidence interval): p70 S6K<sup>Thr421/Ser424</sup> to p70 S6K –0.28 (–0.57 to 0.02) and Akt<sup>Ser473</sup> to Akt 0.34 (0.09 to 0.59). Panel C: Immunohistochemical analysis shows positive staining with a nuclear pattern for Akt<sup>Ser473</sup> in granulosa cells of rats receiving sirolimus and for p70 S6K<sup>Thr421</sup> in granulosa cells of control rats receiving vehicle. doi:10.1371/journal.pone.0045868.g004

prudent for patients receiving sirolimus and this might help guide clinical use of mTOR inhibitors.

## Supporting Information

**Checklist S1 CONSORT Checklist.**  
(PDF)

**Protocol S1 Trial Protocol.**  
(PDF)

## Acknowledgments

We thank Marian Strucker, Ruth Russi, Charlotte Burger and Adrian Wüthrich for technical support; Janine Suter for trial monitoring (KMS

GmbH, Zug); Dr. Natascia Corti, Dr. Gérald Keusch, Dr. Lukas Zimmerli and Dr. Oliver Senn (chair) were members of the data and safety monitoring board. We thank the referring physicians in Switzerland for their support in making this trial possible.

## Author Contributions

Conceived and designed the experiments: ALS DP ADK RPW. Performed the experiments: MB CSR FK PK XW YL JL GA AE. Analyzed the data: ALS JY OS. Contributed reagents/materials/analysis tools: JL. Wrote the paper: MB JY ALS RPW.

## References

- Alam H, Maizels ET, Park Y, Ghaey S, Feiger ZJ, et al. (2004) Follicle-stimulating hormone activation of hypoxia-inducible factor-1 by the phosphatidylinositol 3-kinase/AKT/Ras homolog enriched in brain (Rheb)/mammalian target of rapamycin (mTOR) pathway is necessary for induction of select protein markers of follicular differentiation. *J Biol Chem* 279: 19431–19440.
- Kahan BD (2000) Efficacy of sirolimus compared with azathioprine for reduction of acute renal allograft rejection: a randomised multicentre study. The Rapamune US Study Group. *Lancet* 356: 194–202.
- MacDonald AS (2001) A worldwide, phase III, randomized, controlled, safety and efficacy study of a sirolimus/cyclosporine regimen for prevention of acute rejection in recipients of primary mismatched renal allografts. *Transplantation* 71: 271–280.



4. Kahan BD, Julian BA, Pescovitz MD, Vanrenterghem Y, Neylan J (1999) Sirolimus reduces the incidence of acute rejection episodes despite lower cyclosporine doses in caucasian recipients of mismatched primary renal allografts: a phase II trial. *Rapamune Study Group. Transplantation* 68: 1526–1532.
5. Boobes Y, Bernieh B, Saadi H, Raafat Al Hakim M, Abouchacra S (2010) Gonadal dysfunction and infertility in kidney transplant patients receiving sirolimus. *Int Urol Nephrol* 42: 493–498.
6. Cure P, Pileggi A, Froud T, Norris PM, Baidal DA, et al. (2004) Alterations of the female reproductive system in recipients of islet grafts. *Transplantation* 78: 1576–1581.
7. Alfadhli E, Koh A, Albaker W, Bhargava R, Ackerman T, et al. (2009) High prevalence of ovarian cysts in premenopausal women receiving sirolimus and tacrolimus after clinical islet transplantation. *Transpl Int* 22: 622–625.
8. Gaber AO, Kahan BD, Van Buren C, Schulman SL, Scarola J, et al. (2008) Comparison of sirolimus plus tacrolimus versus sirolimus plus cyclosporine in high-risk renal allograft recipients: results from an open-label, randomized trial. *Transplantation* 86: 1187–1195.
9. Stamm ER, Townsend RR, Johnson AM, Garg K, Manco-Johnson M, et al. (1999) Frequency of ovarian cysts in patients with autosomal dominant polycystic kidney disease. *Am J Kidney Dis* 34: 120–124.
10. Heinonen PK, Vuento M, Maunola M, Ala-Houhala I (2002) Ovarian manifestations in women with autosomal dominant polycystic kidney disease. *Am J Kidney Dis* 40: 504–507.
11. Vora N, Perrone R, Bianchi DW (2008) Reproductive Issues for Adults With Autosomal Dominant Polycystic Kidney Disease. *Am J Kidney Dis* 51: 307–318.
12. Tao Y, Kim J, Schrier RW, Edelstein CL (2005) Rapamycin markedly slows disease progression in a rat model of polycystic kidney disease. *J Am Soc Nephrol* 16: 46–51.
13. Wahl PR, Serra AL, Le Hir M, Molle KD, Hall MN, et al. (2006) Inhibition of mTOR with sirolimus slows disease progression in Han:SPRD rats with autosomal dominant polycystic kidney disease (ADPKD). *Nephrol Dial Transplant* 21: 598–604.
14. Zafar I, Belibi FA, He Z, Edelstein CL (2009) Long-term rapamycin therapy in the Han:SPRD rat model of polycystic kidney disease (PKD). *Nephrol Dial Transplant* 24: 2349–2353.
15. Wu M, Wahl PR, Le Hir M, Waacklerle-Men Y, Wüthrich RP, et al. (2007) Everolimus retards cyst growth and preserves kidney function in a rodent model for polycystic kidney disease. *Kidney Blood Press Res* 30: 253–259.
16. Wu M, Arcaro A, Varga Z, Vogetseder A, Le Hir M, et al. (2009) Pulse mTOR inhibitor treatment effectively controls cyst growth but leads to severe parenchymal and glomerular hypertrophy in rat polycystic kidney disease. *Am J Physiol Renal Physiol* 297: F1597–1605.
17. Shillingford JM, Piontek KB, Germino GG, Weimbs T (2010) Rapamycin ameliorates PKD resulting from conditional inactivation of Pkd1. *J Am Soc Nephrol* 21: 489–497.
18. Serra AL, Poster D, Kistler AD, Krauer F, Raina S, et al. (2010) Sirolimus and kidney growth in autosomal dominant polycystic kidney disease. *N Engl J Med* 363: 820–829.
19. Shivaswamy V, Ochsner L, Maroni D, Wang C, Passer J, et al. (2011) Tacrolimus and sirolimus induce reproductive abnormalities in female rats. *Transplantation* 91: 1333–1339.
20. Braun M, Young J, Reiner CS, Poster D, Wüthrich RP, et al. (2012) Ovarian toxicity from sirolimus. *N Engl J Med* 366: 1062–1064.
21. Ravine D, Gibson RN, Walker RG, Sheffield IJ, Kincaid-Smith P, et al. (1994) Evaluation of ultrasonographic diagnostic criteria for autosomal dominant polycystic kidney disease. *Lancet* 343: 824–827.
22. Serra AL, Kistler AD, Poster D, Straker M, Wüthrich RP, et al. (2007) Clinical proof-of-concept trial to assess the therapeutic effect of sirolimus in patients with autosomal dominant polycystic kidney disease: SUISSE ADPKD study. *BMC Nephrology* 8: 13.
23. Diamanti-Kandaraki E, Kouli CR, Bergiele AT, Filandra FA, Tsianateli TC, et al. (1999) A survey of the polycystic ovary syndrome in the Greek island of Lesbos: hormonal and metabolic profile. *J Clin Endocrinol Metab* 84: 4006–4011.
24. Joffe H, Cohen LS, Suppes T, McLaughlin WL, Lavori P, et al. (2006) Valproate is associated with new-onset oligomenorrhea with hyperandrogenism in women with bipolar disorder. *Biol Psychiatry* 59: 1078–1086.
25. Kistler AD, Poster D, Krauer F, Weishaupt D, Raina S, et al. (2009) Increases in kidney volume in autosomal dominant polycystic kidney disease can be detected within 6 months. *Kidney Int* 75: 235–241.
26. Carlin JB, Wolfe R, Coffey C, Patton GC (1999) Analysis of binary outcomes in longitudinal studies using weighted estimating equations and discrete-time survival methods: prevalence and incidence of smoking in an adolescent cohort. *Stat Med* 18: 2655–2679.
27. Greenland S, Schwartzbaum JA, Finkle WD (2000) Problems due to small samples and sparse data in conditional logistic regression analysis. *Am J Epidemiol* 151: 531–539.
28. Nemes S, Jonasson JM, Genell A, Steineck G (2009) Bias in odds ratios by logistic regression modelling and sample size. *BMC Med Res Methodol* 9: 56.
29. Heinze G (2006) A comparative investigation of methods for logistic regression with separated or nearly separated data. *Stat Med* 25: 4216–4226.
30. Vollset SE, Hirji KF, Afifi AA (1991) Evaluation of exact and asymptotic interval estimators in logistic analysis of matched case-control studies. *Biometrics* 47: 1311–1325.
31. Wahl P, Serra A, Le Hir M, Molle K, Hall M, et al. (2006) Inhibition of mTOR with sirolimus slows disease progression in Han:SPRD rats with autosomal dominant polycystic kidney disease (ADPKD). *Nephrol Dial Transplant* 21: 598–604.
32. Solomon CG, Hu FB, Dunaif A, Rich-Edwards JE, Stampfer MJ, et al. (2002) Menstrual cycle irregularity and risk for future cardiovascular disease. *J Clin Endocrinol Metab* 87: 2013–2017.
33. Popat VB, Prodanov T, Calis KA, Nelson LM (2008) The menstrual cycle: a biological marker of general health in adolescents. *Ann N Y Acad Sci* 1135: 43–51.
34. Poster D, Kistler AD, Krauer F, Blumenfeld JD, Rennert H, et al. (2009) Kidney function and volume progression in unilateral autosomal dominant polycystic kidney disease with contralateral renal agenesis or hypoplasia: a case series. *Am J Kidney Dis* 54: 450–458.
35. Wong H, Vivian L, Weiler G, Filler G (2004) Patients with autosomal dominant polycystic kidney disease hyperfiltrate early in their disease. *Am J Kidney Dis* 43: 624–628.
36. Milutinovic J, Fialkow PJ, Agodoa LY, Phillips LA, Bryant JI (1983) Fertility and pregnancy complications in women with autosomal dominant polycystic kidney disease. *Obstet Gynecol* 61: 566–570.
37. Torres VE, Harris PC, Pirson Y (2007) Autosomal dominant polycystic kidney disease. *Lancet* 369: 1287–1301.
38. Hou X, Arvisais EW, Davis JS (2010) Luteinizing hormone stimulates mammalian target of rapamycin signaling in bovine luteal cells via pathways independent of AKT and mitogen-activated protein kinase: modulation of glycogen synthase kinase 3 and AMP-activated protein kinase. *Endocrinology* 151: 2846–2857.
39. Kayampilly PP, Menon KM (2007) Follicle-stimulating hormone increases tuberlin phosphorylation and mammalian target of rapamycin signaling through an extracellular signal-regulated kinase-dependent pathway in rat granulosa cells. *Endocrinology* 148: 3950–3957.
40. Yu J, Yaba A, Kasiman C, Thomson T, Johnson J (2011) mTOR controls ovarian follicle growth by regulating granulosa cell proliferation. *PLoS One* 6: e21415.
41. Arvisais EW, Romanelli A, Hou X, Davis JS (2006) AKT-independent phosphorylation of TSC2 and activation of mTOR and ribosomal protein S6 kinase signaling by prostaglandin F2alpha. *J Biol Chem* 281: 26904–26913.
42. Adhikari D, Flohr G, Gorre N, Shen Y, Yang H, et al. (2009) Disruption of Tsc2 in oocytes leads to overactivation of the entire pool of primordial follicles. *Mol Hum Reprod* 15: 765–770.
43. (2004) Revised 2003 consensus on diagnostic criteria and long-term health risks related to polycystic ovary syndrome (PCOS). *Hum Reprod* 19: 41–47.
44. Tataranni T, Biondi G, Cariello M, Mangino M, Colucci G, et al. (2011) Rapamycin-induced hypophosphatemia and insulin resistance are associated with mTORC2 activation and Klotho expression. *Am J Transplant* 11: 1656–1664.
45. Johnston O, Rose CL, Webster AC, Gill JS (2008) Sirolimus is associated with new-onset diabetes in kidney transplant recipients. *J Am Soc Nephrol* 19: 1411–1418.
46. Goodarzi MO, Jones MR, Chen YD, Azziz R (2008) First evidence of genetic association between AKT2 and polycystic ovary syndrome. *Diabetes Care* 31: 2284–2287.
47. Lima MH, Souza LC, Caperuto LC, Bevilacqua E, Gasparetti AL, et al. (2006) Up-regulation of the phosphatidylinositol 3-kinase/protein kinase B pathway in the ovary of rats by chronic treatment with hCG and insulin. *J Endocrinol* 190: 451–459.
48. Levey AS, Stevens LA, Schmid CH, Zhang YL, Castro AF 3rd, et al. (2009) A new equation to estimate glomerular filtration rate. *Ann Intern Med* 150: 604–612.
